# Supplementary material for: Switching-Type Fluorescence Probe Based on Carbon Dot Nanocomposites for the Visual Detection of Superoxide Anions
Source: Research Square preprint supplement (doi:10.21203/rs.3.rs-6467425/v1), 2025-05-08
Supplement: Supplementary file 1 [file 279b899cfdbdca502aaa0218.docx]

**Supplementary Information**

**Switching-Type Fluorescence Probe Based on Carbon Dot Nanocomposites for the Visual Detection of Superoxide Anions**

Jiao Zhang1a, Bin Liao1b, Yuxin Peia, Yuxin Huangc, Zhiyan Liuc, Yuanqiang Wang*a, Qinghua Yu*b, and Wanyi Chen*b

a School of Pharmacy and Bioengineering, Chongqing University of Technology, Chongqing 400054, China.

b Department of Pharmacy, Chongqing University Cancer Hospital, Chongqing 400030, China

c School of Medicine, Chongqing University, Chongqing 400044, China.

* Corresponding authors: Department of Pharmacy, Chongqing University Cancer Hospital, Chongqing, P. R. China.

1 These authors contributed equally to this work.

E-mail addresses: chenwanyi@cqu.edu.cn (W. Chen).


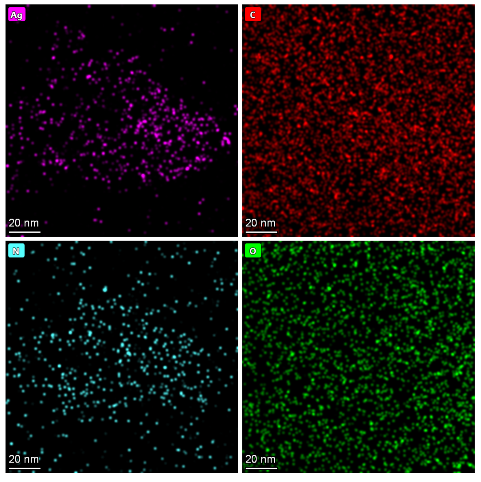


Figure S1.Elemental analysis diagram of O-QD@Ag. Scale bar = 20 nm.


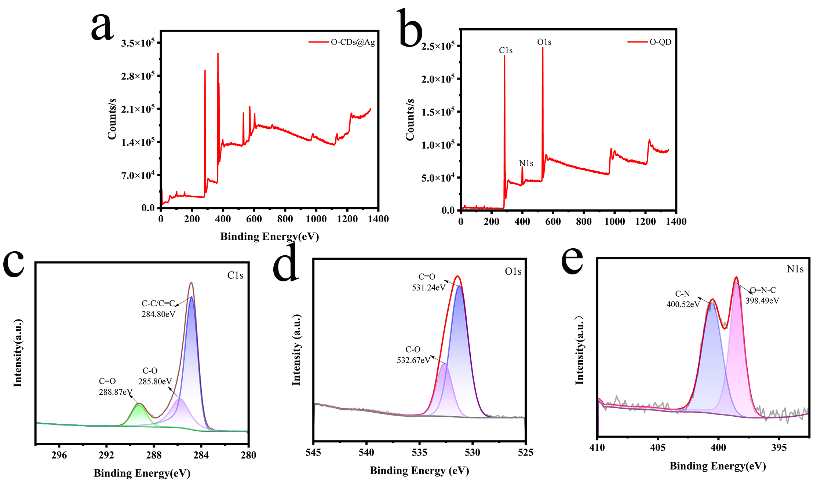


Figure S2. (a) Full XPS spectrum of O-QD@Ag; (b) Full XPS spectrum of O-QD; (c-e) XPS high-resolution C 1s, N1s, and O1s spectra of O-QD, respectively.


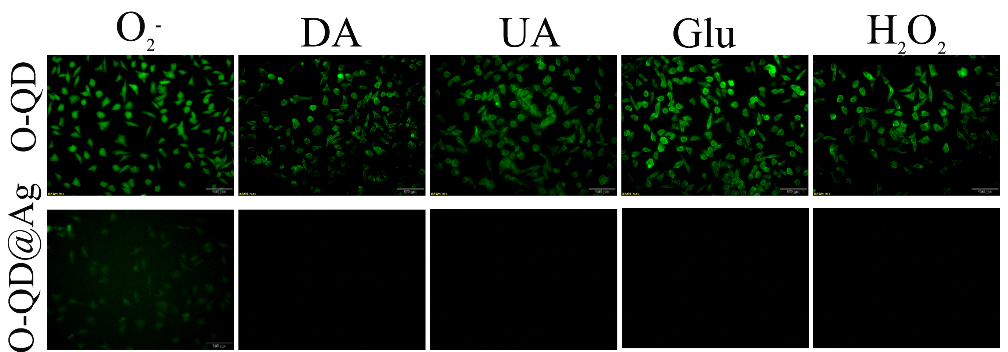


Figure S3. The selectivity of O2•− and different interferors including H2O2, UA, DA and glucose was analyzed by fluorescence microscope image detection.
